# Supplementary material for: Unveiling the role of lithium in cerium oxide based ceramic fuel cells employing lithium compounds as the anode
Source: Royal Society of Chemistry journal article supplement (doi:10.1039/d2cp02445d), 2022-01-01
Supplement: d2cp02445d1.pdf [file d2cp02445d1.pdf]

Supporting Information

**Unveiling the role of lithium in cerium oxide based ceramic fuel cells  
employing lithium compounds as anode**

*Enyi Hu,<sup>a</sup> Wenjuan Zhao,<sup>a</sup> Zheng Jiang,<sup>a</sup> Faze Wang,<sup>a</sup> Jun Wang,<sup>a\*</sup> Bin Zhu<sup>a\*</sup> and  
Peter Lund<sup>b</sup>*

<sup>a</sup> Jiangsu Provincial Key Laboratory of Solar Energy Science and Technology/ Energy Storage Joint  
Research Center, School of Energy & Environment, Southeast University, Nanjing 210096, China.

<sup>b</sup> Department of Engineering Physics/Advanced Energy Systems, School of Science, Aalto  
University, 00076 Aalto, Espoo, Finland.

\* Corresponding authors: fazewang@seu.edu.com; zhu-bin@seu.edu.cn

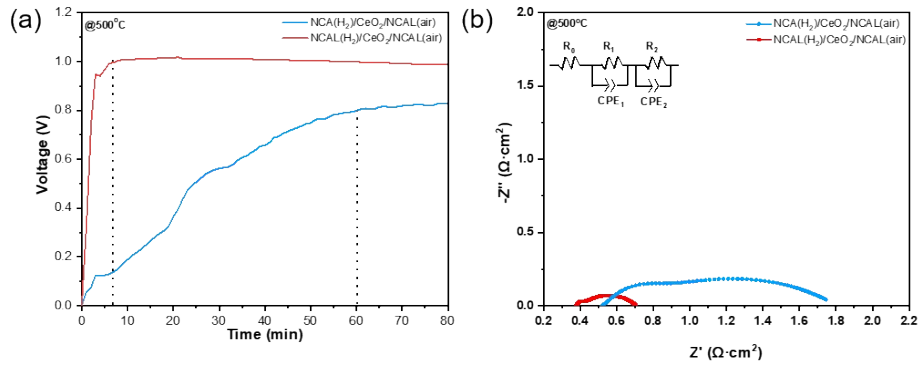

**Fig. S1** (a) extended stability under OCV state for NCAL/CeO<sub>2</sub>/NCAL and (b) the EIS result for fuel cells under OCV in H<sub>2</sub>/air atmosphere at 500 °C.

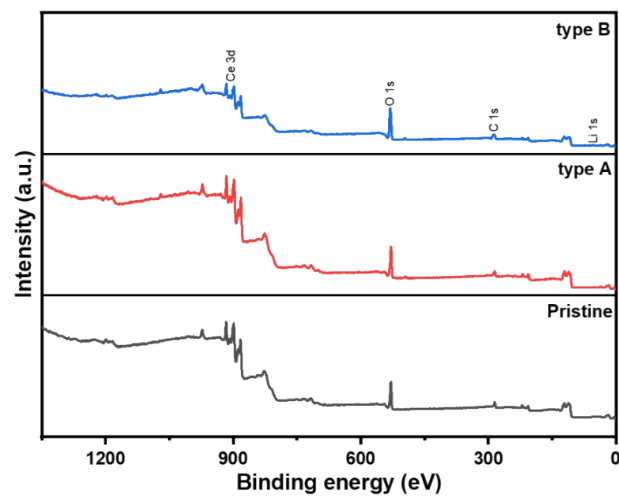

**Fig. S2** XPS survey results for pristine CeO<sub>2</sub> and type A \ type B cell after hydrogen treatment.

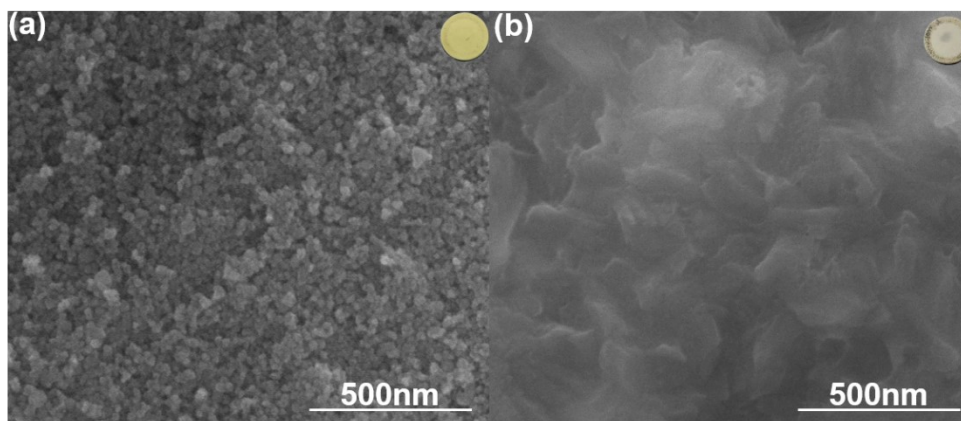

**Fig. S3** SEM images for type B cell (a) before and (b) after hydrogen treatment.

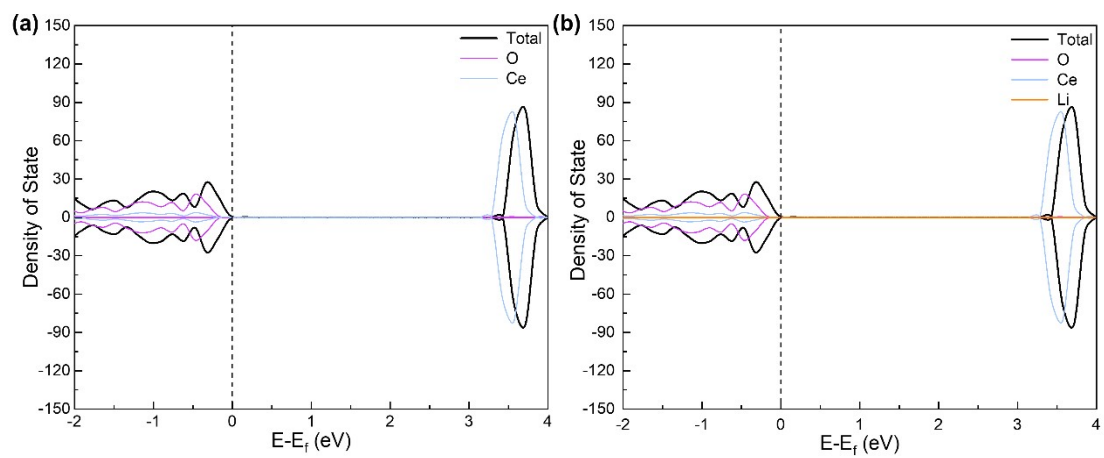

**Fig. S4** partial density of state for (a)  $\text{CeO}_2$  and (b)  $\text{Li}_{0.0625}\text{Ce}_{0.9375}\text{O}_2$ .

**Table S1** EIS fitting results for NCA or NCAL as anode at 500 °C, R has the unit of  $\Omega \text{ cm}^2$ .

|                             | R0    | R1    | CPE1-T | CPE1-P | R2    | CPE2-T | CPE2-P | RP    |
|-----------------------------|-------|-------|--------|--------|-------|--------|--------|-------|
| NCAL/CeO <sub>2</sub> /NCAL | 0.378 | 0.023 | 0.016  | 1.212  | 0.308 | 1.372  | 0.540  | 0.331 |
| NCA/CeO <sub>2</sub> /NCAL  | 0.518 | 0.183 | 0.025  | 0.846  | 1.107 | 0.509  | 0.404  | 1.290 |

**Table S2** peak fitting detail resulting for Ce 3d of type A and type B cell before and after treatment.

| pristine          |          | Type A            |           | Type B            |           |
|-------------------|----------|-------------------|-----------|-------------------|-----------|
| peak position(eV) | area     | peak position(eV) | area      | peak position(eV) | area      |
| 882.161           | 78998.64 | 881.748           | 88059.769 | 882.46            | 82090.401 |
| 884.67            | 31701.06 | 884.718           | 35840.988 | 885.045           | 48813.004 |
| 888.593           | 54420.46 | 888.301           | 46790.619 | 889.03            | 48922.397 |
| 897.986           | 90301.59 | 897.576           | 86052.122 | 898.435           | 88641.184 |
| 900.681           | 61323.52 | 900.294           | 59221.475 | 901.003           | 44484.65  |
| 902.845           | 12128.27 | 902.67            | 19331.629 | 902.688           | 29875.198 |
| 907.2             | 54069.9  | 906.776           | 50292.857 | 907.515           | 52670.763 |
| 916.322           | 79328.4  | 915.912           | 76692.586 | 916.719           | 66761.531 |
